# Supplementary material
Source: PubMed Central journal article supplement (PMC5065061)
Supplement: NIHMS714413-supplement-supp_tables.pdf [file NIHMS714413-supplement-supp_tables.pdf]

Supplemental Tables

Table S1. Pairwise Pearson Correlation Coefficients for LN(Perfluoroalkyl and Polyfluoroalkyl Substances Concentration), Children Aged 12 – 19 Years, National Health and Nutrition Examination Survey 1990 – 2000 and 2003 – 2004, n=1191 (p<0.0001)

|       | PFOS | PFOA | PFHxS | PFNA |
|-------|------|------|-------|------|
| PFOS  | 1    |      |       |      |
| PFOA  | 0.72 | 1    |       |      |
| PFHxS | 0.60 | 0.45 | 1     |      |
| PFNA  | 0.31 | 0.47 | 0.14  | 1    |

Table S2. Pairwise Pearson Correlation Coefficients for LN(Perfluoroalkyl and Polyfluoroalkyl Substances Concentration), Children Aged 12 – 19 Years, National Health and Nutrition Examination Survey 2005 – 2006, n=640 (p<0.0001)

|       | PFOS | PFOA | PFHxS | PFNA |
|-------|------|------|-------|------|
| PFOS  | 1    |      |       |      |
| PFOA  | 0.70 | 1    |       |      |
| PFHxS | 0.52 | 0.36 | 1     |      |
| PFNA  | 0.49 | 0.66 | 0.15  | 1    |
